# Supplementary material for: Biomarkers associated with low, moderate, and high vastus lateralis muscle hypertrophy following 12 weeks of resistance training
Source: PLoS One. 2018 Apr 5;13(4):e0195203. doi: 10.1371/journal.pone.0195203 (PMC5886420; doi:10.1371/journal.pone.0195203)
Supplement: S2 File — (XLSX) [file pone.0195203.s003.xlsx]

## Sheet: Cluster from VL thickness
deltaVL_response_cluster	subject	protein_group	Age	T1_VL	T39_VL	VL Thickness	T1_LBM_kg	T39_LBM	T1_FatMass_kg	T39_FatMass	delta_FatMass	T1_3RMsquat_kg	T39_3RMsquat_kg	delta_3RMsquat	T1_RNA	T39_RNA	delta_RNA	T1_RNA_trans	T39_RNA_trans	T1_TypeII_percent	T1_TypeI_percent	T1_typeIIfCSA	T39_typeIIfCSA	delta_typeIICSA	T1_typeIfCSA	T39_typeIfCSA	T1_totalfCSA	T39_totalfCSA	delta_totalfCSA	T1_SC#	T39_SC#	delta_SC#	T1_SC#_trans	T39_SC#_trans	T1_typeIIMN#	T39_typeIIMN#	T1_typeIMN#	T39_typeIMN#	T1_45S	T39_45S	T1_45S_trans	T39_45S_trans	T1_IL6mRNA	T39_IL6mRNA	T1_IL6mRNA_trans	T39_IL6mRNA_trans	T1_IL1b	T39_IL1b	T1_IL1b_trans
1	MPS002	7	21	2.78	3.01	0.23	61.55	63.5	11.79	10.34	-1.45	95.25	124.74	29.48	323.8	313.7	-10.1	2.51028	2.49651	56	44	5377	5132	-245	3924	4337.95	4481	4542	61	14	9	-5	1.14613	0.954243	2.38	4.21	2.38	3.71
1	MPS028	6	21	1.94	2.19	0.25	65.73	64.36	13.85	15.69	1.84				279.6	424.2	144.6	2.44654	2.62757	71	29	6095	6117	22	3955	3275	5115	5101	-14	5	12	8	0.69897	1.07918	3.05	3.82	2.23	2.8	1.07246	0.985507	0.0303826	-0.00634018	0.0566038	0.0943396	-1.24715	-1.02531	0.907127	1.37365	-0.0423317
1	MPS073	5	23	2.49	2.42	-0.07	67.22	67.31	19.91	18.46	-1.45	102.06	117.93	15.88	250.2	292.7	42.6	2.39829	2.46642	69	31	6796.3	4796.8	-1999	3943.2	3118.27	5507	4053	-1454	6	13	7	0.778151	1.11394	4.89	4.54	2.43	3.4	0.57971	0.811594	-0.236789	-0.0906611	1.41509	2.81132	0.150785	0.44891	0.233261	0.596112	-0.632157
1	MPS080	6	21	2.87	2.95	0.08	67.45	69.17	22	20	-2	74.84	120.2	45.36	382.2	407.2	25	2.58229	2.60981	70	30	4506.1	4163.9	-342	5153.3	4774.42	4431	4078	-353	5	12	7	0.69897	1.07918	2.34	3.59	2.52	3.88	1.30435	1.07246	0.115393	0.0303826	3.32075	1.56604	0.521237	0.194802	1.47732	0.75162	0.169475
1	MPS020	4	19	2.3	2.42	0.12	51.57	57.81	18.6	20.14	1.54	92.99	115.67	22.68	358.3	396	37.7	2.55425	2.5977	64	36	6792	7833	1041	4068	4201	5449	6322	872	7	4	-2	0.845098	0.60206	2	2.74	1.4	1.71	1.65217	0.521739	0.218056	-0.282547	0.188679	0.188679	-0.724276	-0.724276	3.23974	1.11447	0.51051
1	MPS022	9	21	2.37	2.59	0.22	56.2	58.51	23.59	25.27	1.68	88.45	136.08	47.63						86	14	4878	5697	818	2875	3299	4238	5018	780	8	2	-6	0.90309	0.30103	0.53	3.39	0.33	1.6	0.289855	0.753623	-0.537819	-0.122846	0.0377358	0.150943	-1.42325	-0.821186	0.0777538	0.75162	-1.10928
1	MPS034	7	23	2.96	3.12	0.16	57.33	60.1	11.97	11.43	-0.54	102.06	136.08	34.02	336.3	464.8	128.5	2.52673	2.66727	66	34	3812	4391	579	4248	4546	3750	4235	485	1	7	5	0	0.845098	1.84	3.17	2.06	4.19
1	MPS042	7	19	2.32	2.33	0.01	67.49	71.42	24.31	25.71	1.4				263.9	364.5	100.6	2.42144	2.5617	73	27	4116.2	4974.3	858	3690	4351	3747	4498	751	6	9	3	0.778151	0.954243	1.13	3.34	1.16	3.52	1.56522	1.01449	0.194575	0.00624895	0.622642	4.39623	-0.205762	0.64308	1.37365	1.14039	0.137876
1	MPS050	6	20	2.32	2.5	0.18	60.24	61.01	18.91	17.92	-1	124.74	142.88	18.14	422.7	319.2	-103.6	2.62603	2.50406	62	38	4982	6301	1319	4396.5	4535.35	4498	5379	881	7	11	3	0.845098	1.04139	3	5.1	3	3.87	0.202899	0.608696	-0.692721	-0.2156	1.56604	1.30189	0.194802	0.114573	0.0518359	0.544276	-1.28537
1	MPS065	9	20	2.57	2.64	0.07	61.14	64.86	10.39	10.02	-0.36	61.24	86.18	24.95						71	29	4234	4545	311	2643.7	3371.93	3519	3735	216	0	9	9		0.954243	3.23	3.04	2.06	2.78	1.3913	0.869565	0.143422	-0.0606978	2.20755	3.9434	0.34391	0.59587	0.103672	0.673866	-0.98434
1	MPS068	4	22	2.74	2.46	-0.28	58.47	58.01	30.21	27.94	-2.27	92.99	122.47	29.48	450	283.5	-166.5	2.65321	2.45255	47	53	5310	6632	1322	4504.8	4598.17	4670	5549	878	6	20	14	0.778151	1.30103	4.23	4.3	3.67	3.1	0.492754	0.492754	-0.30737	-0.30737	1.26415	2.54717	0.101799	0.406058	0.958963	0.62203	-0.018198
1	MPS004	4	20	2.23	2.36	0.13	52.71	54.25	9.21	9.34	0.14				309.9	481.4	171.5	2.49122	2.68251	58	42	4462	6128	1666	4079	5142	4082	5432	1350	20	13	-7	1.30103	1.11394	1.78	2.72	1.83	1.82
1	MPS007	4	21	2.44	2.6	0.16	59.06	59.6	32.79	38.19	5.4	97.52	90.72	-6.8						68	32	4480	6951	2471	2711	4689	3658	5891	2233	7	9	1	0.845098	0.954243	2.71	2.83	2.23	2.44
1	MPS010	7	20	3.34	3.57	0.23	73.57	79.61	12.11	11.39	-0.73	83.91	129.27	45.36	408	433.9	25.9	2.61066	2.63739	57	43	5840	7384	1545	3831	5649	4696	6143	1446	11	14	3	1.04139	1.14613	2.16	4.86	1.3	4.6	1.42029	0.956522	0.152377	-0.0193052	0.169811	0.0943396	-0.770033	-1.02531	2.35853	1.71058	0.372642
1	MPS014	5	23	2.67	2.91	0.24	53.39	57.74	24.27	19.89	-4.39	61.24	117.93	56.7	319	354.5	35.5	2.50379	2.54962	83	17	3657	6230	2573	3606	5213	3392	5583	2191	10	13	3	1	1.11394	1.87	1.86	2.79	1.81	1.18841	0.550725	0.0749648	-0.259065	0.396226	0.0566038	-0.402057	-1.24715	0.958963	0.103672	-0.018198
1	MPS023	7	19	3.08	3.1	0.02	52.79	53.56	12.93	13.65	0.73	120.2	151.95	31.75	329.3	389.5	60.2	2.51759	2.59051	70	30	5110	8702	3592	4359	6708	4580	7497	2917	5	18	13	0.69897	1.25527	3.27	3.04	2.32	1.93
1	MPS055	5	20	2.44	2.59	0.15	56.52	58.83	23.5	21.41	-2.09	83.91	127.01	43.09	482.5	391.7	-90.8	2.6835	2.59295	69	31	4315	6183	1868	4188.34	4165.13	4023	5127	1104	8	31	24	0.90309	1.49136	3.38	5	3.45	5.32	0.84058	2.4058	-0.0754211	0.381259	0.754717	2.79245	-0.122216	0.445986	0.259179	0.933045	-0.5864
Mean		6	20.7647	2.58	2.69176	0.111765	60.1429	62.3324	18.8435	18.6347	-0.208824	91.5286	122.794	31.2657	351.121	379.771	28.65	2.53756	2.57404	67.0588	32.9412	4986.04	6009.47	1023.47	3892.7	4469.07	4343.29	5187.24	843.765	7.41176	12.1176	4.70588	0.828837	1.01781	2.57588	3.62059	2.18588	3.08706	1	0.92029	-0.0767458	-0.0788785	1	1.66195	-0.298518	-0.166162	1	0.859611	-0.290481
StdDev		1.62019	1.34766	0.350624	0.362254	0.135657	6.32905	6.65241	7.09276	7.68258	2.21448	18.4803	17.8547	16.2613	69.8871	61.6881	96.7473	0.0858611	0.072217	9.51624	9.51624	950.679	1262.63	1300.36	653.87	921.904	635.101	964.345	1040.71	4.62411	6.58485	7.84032	0.277514	0.285099	1.07872	0.923407	0.83354	1.10919	0.505153	0.510062	0.302072	0.187562	1.00621	1.59967	0.625891	0.73302	0.996866	0.425564	0.605445
Count		17	17	17	17	17	17	17	17	17	17	14	14	14	14	14	14	14	14	17	17	17	17	17	17	17	17	17	17	17	17	17	16	17	17	17	17	17	12	12	12	12	12	12	12	12	12	12	12
within t-test					0.00368402			0.000649613		0.702308			7.01143e-06			0.287875			0.252729				0.00507502			0.0200068		0.0041242			0.0226789			0.0543994		0.000859049		0.00433047		0.699556		0.981838		0.141303		0.34568		0.57882
2	MPS011	9	20	2.03	2.42	0.39	53.43	55.75	20.73	21.18	0.45	74.84	124.74	49.9						77	23	6473	5810	-663	5637	5385	5859	5341	-518	4	8	4	0.60206	0.90309	3.5	2.63	4.83	2.3
2	MPS012	4	21	2.91	3.25	0.34	62.96	65.54	20.18	18.19	-2	74.84	113.4	38.56	527.8	460.7	-67.1	2.72247	2.66342	44	56	5931	5119	-812	5950	4166	5720	4453	-1266	3	7	4	0.477121	0.845098	1.9	2.33	2.47	1.52	0.724638	0.84058	-0.139879	-0.0754211	0.113208	0.132075	-0.946125	-0.879178	2.25486	0.829374	0.35312
2	MPS021	9	20	1.97	2.46	0.49	53.93	57.88	11.21	12.47	1.26	56.7	97.52	40.82	310.8	263.8	-47	2.49248	2.42127	72	28	7311	5296	-2015	3723	3990	5863	4470	-1393	11	7	-4	1.04139	0.845098	2.18	1.96	1	1.78	1.5942	0.927536	0.202544	-0.0326691	0.113208	0.169811	-0.946125	-0.770033	1.50324	1.24406	0.177028
2	MPS059	4	21	2.72	3.19	0.47	62.28	64.27	5.81	8.21	2.4	111.13	142.88	31.75	364.7	486.2	121.5	2.56194	2.68681	80	20	4566	3681	-884	5695.6	5006.75	4486	3800	-685	8	18	10	0.90309	1.25527	3.89	2.28	3.5	2.55	0.637681	0.724638	-0.195396	-0.139879	1.18868	1.16981	0.0750647	0.0681158	0.570194	0.855292	-0.243977
2	MPS064	5	20	2.37	2.7	0.33	57.79	59.6	17.46	16.28	-1.18	79.38	106.59	27.22	393.9	544.6	150.8	2.59539	2.73608	61	39	4519	4449	-70	2161.4	3201	3356	3625	269	2	8	6	0.30103	0.90309	3.72	4.23	1.89	4.07	0.666667	0.521739	-0.176091	-0.282547	1.66038	2.32075	0.220207	0.365629	0.388769	0.62203	-0.410308
2	MPS066	7	22	2.44	2.87	0.43	56.93	60.46	8.48	9.84	1.36	70.31	92.99	22.68	370.2	372.2	2	2.56844	2.57078	64	36	5389.5	4983.7	-406	3261.7	3475.38	4325	4123	-203	9	11	2	0.954243	1.04139	3.65	3.68	2.39	3.15	0.318841	0.550725	-0.496426	-0.259065	1.9434	6.22642	0.288561	0.794238	1.16631	0.958963	0.0668128
2	MPS074	6	21	2.74	3.14	0.4	56.2	58.15	9.07	10.52	1.45	83.91	115.67	31.75	305.7	414.8	109	2.4853	2.61784	82	18	5756.9	5436.1	-321	4326	3640.9	5096	4654	-442	4	18	14	0.60206	1.25527	4.13	4.05	3.14	4.1	1.24638	0.637681	0.0956494	-0.195396	1.83019	2.60377	0.262496	0.415603	1.91793	0.803456	0.282832
2	MPS075	6	22	2.28	2.68	0.4	45.72	47.26	14.7	15.69	1	52.16	86.18	34.02	318.5	419.2	100.7	2.50311	2.62242	58	42	5919.4	5011.7	-908	4039.5	4665.95	4845	4607	-238	4	13	9	0.60206	1.11394	3.31	4.31	3.22	5.05	1.97101	0.608696	0.29469	-0.2156	1.92453	2.5283	0.284324	0.402829	1.84017	1.11447	0.264859
2	MPS084	7	20	3.01	3.5	0.49	67.4	69.13	21.18	21.95	0.77	102.06	172.37	70.31	282.6	420.6	138	2.45117	2.62387	75	25	6442.6	6372.7	-70	3906.6	4439.83	5405	5375	-30	10	14	4	1	1.14613	3.47	2.62	2.29	2.57	1.65217	0.637681	0.218056	-0.195396	2.84906	1.60377	0.454701	0.205143	0.336933	0.181425	-0.472456
2	MPS085	6	20	2.32	2.64	0.32	61.82	65.41	22.82	23.18	0.36	79.38	136.08	56.7	315.4	692.2	376.8	2.49886	2.84023	54	46	5093.2	3224.5	-1869	3813.8	2848.22	4268	2915	-1352	5	11	6	0.69897	1.04139	4.57	4.83	3.93	4.42	4.31884	1.65217	0.635367	0.218056	3.43396	2.37736	0.535796	0.376095	1.71058	0.362851	0.233144
2	MPS089	9	20	2.24	2.59	0.35	47.45	48.58	19.82	17.92	-1.91	70.31	95.25	24.95	382.5	473.7	91.1	2.58263	2.6755	50	50	3323	3066	-257	3081.6	2835.27	3062	2816	-246	1	13	12	0	1.11394	2.19	3.35	2.64	3.69	1.07246	0.724638	0.0303826	-0.139879	0.113208	0.150943	-0.946125	-0.821186	0.0518359	0.0518359	-1.28537
2	MPS038	9	22	2.25	2.58	0.33	58.51	61.14	22.27	18.1	-4.17	79.38	124.74	45.36	247.5	391.6	144.1	2.39358	2.59284	72	28	3600	4632	1031	2769	2307	3149	3813	663	6	8	2	0.778151	0.90309	1.22	1.83	1.14	1.26	1.27536	1.53623	0.105634	0.186457	0.150943	0.339623	-0.821186	-0.469003	1.63283	1.63283	0.212941
2	MPS041	5	19	2.58	3.04	0.46	60.64	60.77	46.31	42.91	-3.4	83.91	115.67	31.75	366.5	386.8	20.4	2.56407	2.58749	71	29	3624	4803	1180	3159	2745	3271	4040	769	4	6	2	0.60206	0.778151	2.06	3.28	1.09	1.89	2.26087	1.30435	0.354276	0.115393	0.113208	0.264151	-0.946125	-0.578148	2.12527	1.60691	0.327414
2	MPS044	7	19	2.76	3.13	0.37	60.84	59.38	9.88	9.21	-0.68	79.38	122.47	43.09	311.6	453.3	141.7	2.4936	2.65639	49	51	5594.2	6232.9	639	5006	4424	5062	5480	418	14	3	-11	1.14613	0.477121	1.77	5.63	1.87	4.23	2.66667	0.492754	0.425969	-0.30737	3.01887	3.11321	0.479844	0.493208	3.70626	1.24406	0.568936
2	MPS045	4	19	2.27	2.68	0.41	55.79	57.88	22.82	24.13	1.32	68.04	97.52	29.48	748.5	391.9	-356.7	2.87419	2.59318	67	33	6590	7929	1338	2744	3728	4936	6050	1114	5	10	5	0.69897	1	1.36	3.24	0.64	2.5	0.434783	0.869565	-0.361728	-0.0606978	1.81132	2.03774	0.257995	0.309148	0.647948	1.08855	-0.18846
2	MPS048	6	20	2.3	2.76	0.46	56.06	55.7	10.43	11.2	0.77	79.38	122.47	43.09	299.6	347.1	47.4	2.47654	2.54045	51	49	7415	7635	220	4606	3333	5722	5222	-500	1	5	4	0	0.69897	3.59	4.26	3.14	2.22	1.24638	2.23188	0.0956494	0.348672	2.28302	5.84906	0.35851	0.767086	2.51404	2.12527	0.400372
2	MPS049	4	21	2.39	2.79	0.4	61.96	66.45	19.46	19.91	0.45	92.99	124.74	31.75	309.7	377.5	67.8	2.49094	2.57692	64	36	3096	3725	629	3095.1	2902	2927	3258	330	8	9	1	0.90309	0.954243	2.3	2.25	2.27	1.84	1.62319	0.318841	0.210369	-0.496426	2.56604	2.64151	0.409263	0.421852	0.984881	1.34773	-0.00661615
2	MPS053	6	20	2.36	2.71	0.35	65.54	69.85	8.89	6.62	-2.27	108.86	149.69	40.82	266.8	356.9	90	2.42619	2.55255	64	36	5204	6259	1055	3971.3	4393.06	4482	5462	980	7	16	9	0.845098	1.20412	4.09	3.97	4.22	4	1.13043	0.695652	0.0532455	-0.157608	3.5283	2.15094	0.547566	0.332629	1.24406	1.55508	0.0948415
2	MPS067	5	20	2.49	2.97	0.48	51.89	54.16	25.72	26.04	0.32	102.06	111.13	9.07	552.5	440.3	-112.2	2.74233	2.64375	51	49	6817	7021.8	205	4964.5	4404.59	5612	5906	295	6	20	14	0.778151	1.30103	4.71	3.18	3.73	3.25	0.637681	0.492754	-0.195396	-0.30737	1.37736	1.35849	0.139047	0.133057	0.336933	0.285097	-0.472456
2	MPS076	4	19	2.17	2.54	0.37	48.04	52.16	35.47	32.66	-2.81	43.09	72.57	29.48	337.4	528.6	191.2	2.52815	2.72313	51	49	5191	5565	375	3646	3713.81	4215	4224	9	16	12	-4	1.20412	1.07918	2.71	3.76	1.55	2.9	1.04348	0.666667	0.0184834	-0.176091	1.84906	1.88679	0.26695	0.275724	1.26998	0.62203	0.103796
2	MPS083	5	20	3.01	3.33	0.32	69.72	70.31	21.27	21.86	0.59	97.52	124.74	27.22	467.7	637.3	169.5	2.66997	2.80434	46	54	7769.6	8169.6	400	4401.4	3803.77	5644	5962	318	12	13	1	1.07918	1.11394	3.38	5.76	2.73	3.5	1.24638	0.608696	0.0956494	-0.2156	2.71698	2.22642	0.434087	0.347606	1.37365	0.0777538	0.137876
2	MPS087	9	20	2.41	2.83	0.42	56.88	59.74	12.34	10.07	-2.27	54.43	92.99	38.56	291.5	412.1	120.6	2.46464	2.615	80	20	5418	6656	1238	4319	5856.79	4830	6043	1213	13	18	5	1.11394	1.25527	2.43	4.87	1.82	5	0.956522	0.608696	-0.0193052	-0.2156	0.207547	0.226415	-0.682883	-0.645095	0.544276	0.336933	-0.26418
2	MPS090	7	21	2.24	2.76	0.52	51.17	56.11	9.8	11.11	1.32	79.38	104.33	24.95	577.7	290.7	-287	2.7617	2.46345	70	30	3501.4	3718.7	217	2584.7	2946.08	3020	3271	251	4	13	9	0.60206	1.11394	2.9	2.31	2.68	1.73	1.5942	1.04348	0.202544	0.0184834	4.83019	0.943396	0.683964	-0.0253059	1.32181	0.803456	0.12117
2	MPS093	5	23	2.54	3.01	0.47	57.65	58.79	21.6	24.5	2.9	102.06	140.61	38.56	322.1	426.2	104	2.50799	2.62961	56	44	5084	6078.7	995	3539.4	3970.31	4162	4875	714	4	13	9	0.60206	1.11394	3.11	4.7	2.63	3.71	1.04348	0.521739	0.0184834	-0.282547	0.132075	0.0943396	-0.879178	-1.02531	1.7365	0.544276	0.239675
2	MPS006	6	20	2.58	2.95	0.37	57.74	57.15	11.33	12.2	0.88	61.24	97.52	36.29	269	331.9	62.9	2.42975	2.52101	57	43	7140	8626	1486	3921	4917	5410	5987	577						2.41	2.91	1.52	2.44
2	MPS030	6	19	2.72	3.02	0.3	58.07	65.77	14.33	14.51	0.18	97.52	129.27	31.75	254.6	353.4	98.8	2.40586	2.54827	70	30	3901	5486	1585	4289	4717	3784	4923	1139	6	8	2	0.778151	0.90309	1.74	3.5	1.75	3.65	1.68116	0.985507	0.225609	-0.00634018	0.150943	0.0943396	-0.821186	-1.02531	2.15119	0.88121	0.332678
2	MPS032	6	21	2.38	2.67	0.29	54.61	58.24	38.1	37.33	-0.77	74.84	124.74	49.9	333.7	424	90.3	2.52336	2.62737	77	23	3859	5486	1627	4113	3758	3666	4214	548	5	13	8	0.69897	1.11394	1.31	3.34	1.27	3.17	0.985507	1.3913	-0.00634018	0.143422	0.113208	0.113208	-0.946125	-0.946125	0.933045	0.647948	-0.0300972
2	MPS046	6	19	2.76	3.19	0.43	53.21	55.25	21.77	22.95	1.18	79.38	117.93	38.56	329.8	456.6	126.8	2.51825	2.65954	74	26	5374	8036	2662	3874	5492	4649	6995	2345	5	8	4	0.69897	0.90309	2.93	4.72	1.96	3.67	0.869565	1.71014	-0.0606978	0.233033	2.07547	3.0566	0.317117	0.485239	1.47732	2.95464	0.169475
2	MPS091	7	21	2.2	2.55	0.35	53.12	54.88	43.7	39.5	-4.2	65.77	90.72	24.95	466.8	452.4	-14.4	2.66913	2.65552	54	46	4080.1	6078.7	1999	3300.6	3109.3	3535	3410	-125	4	11	7	0.60206	1.04139	3.23	2.19	2.87	1.49	0.492754	0.695652	-0.30737	-0.157608	0.113208	0.245283	-0.946125	-0.610333	1.2959	0.75162	0.11257
Mean		6.17241	20.3448	2.46345	2.86034	0.396897	57.15	59.509	19.55	19.3186	-0.231034	79.4569	115.432	35.9755	368.754	428.807	60.0357	2.55007	2.62318	63.4828	36.5172	5309.76	5675.45	365.724	3927.56	3937.07	4495.21	4666	170.828	6.46429	11.2143	4.78571	0.725471	1.01494	2.88828	3.51621	2.42	3.02241	1.31079	0.888889	0.0490358	-0.0983554	1.56324	1.70091	-0.106137	-0.0593265	1.37173	0.945524	0.0305785
StdDev		1.6272	1.04457	0.273891	0.278971	0.0639812	5.68713	5.8228	10.4045	9.50086	1.90772	17.288	21.4343	11.7342	115.276	92.0621	141.662	0.116979	0.0897049	11.4256	11.4256	1339.4	1499.61	1106.74	932.402	906.005	959.654	1079.04	826.631	3.89189	4.27185	5.45933	0.298092	0.186832	0.979216	1.09315	1.02599	1.07776	0.820281	0.460131	0.248315	0.199953	1.3314	1.63444	0.6256	0.596139	0.801264	0.64876	0.375807
Count		29	29	29	29	29	29	29	29	29	29	29	29	29	28	28	28	28	28	29	29	29	29	29	29	29	29	29	29	28	28	28	28	28	29	29	29	29	27	27	27	27	27	27	27	27	27	27	27
within t-test					4.18771e-24			2.2503e-07		0.518612			5.79956e-16			0.0332857			0.00876469				0.086029			0.949373		0.275459			9.00116e-05			8.01513e-05		0.013458		0.019289		0.0131678		0.0114248		0.620494		0.333753		0.00880502
t-test to low			0.243966	0.21612	0.0836936	1.79861e-12	0.105514	0.139212	0.80552	0.802172	0.971514	0.0420489	0.27319	0.284215	0.602988	0.0800559	0.460939			0.282974	0.282974	0.386861	0.444747	0.0750178	0.892779	0.0626557	0.564211	0.107582	0.0197162	0.464931	0.578843	0.968071	0.263315	0.967917	0.319884	0.742762	0.42917	0.846849					0.199817	0.945253	0.381219	0.633192	0.222776	0.677779	0.049809
3	MPS060	9	21	1.99	3.19	1.2	61.1	63.37	16.28	17.6	1.32	61.24	111.13	49.9	337.9	880.8	542.9	2.52879	2.94488	80	20	6404	5293	-1111	4120.2	4344.86	5506	4723	-783	2	12	10	0.30103	1.07918	4.18	4.45	2.67	3.76	3.3913	0.753623	0.530367	-0.122846	3.32075	4.60377	0.521237	0.663114	0.518359	0.596112	-0.28537
3	MPS070	7	19	2.46	3.18	0.72	57.02	62.96	29.71	27.17	-2.54	61.24	99.79	38.56	579	475.8	-103.2	2.76268	2.67742	75	25	5115.3	4614.6	-501	4496	4737.09	4636	4408	-228	8	16	8	0.90309	1.20412	2.39	4.73	2.27	4.91
3	MPS017	5	20	2.17	2.8	0.63	58.24	63.46	15.79	15.49	-0.29	52.16	113.4	61.24	306.2	419.9	113.7	2.48601	2.62315	84	16	4460	5670	1210	4771	4631	4189	5070	881	14	12	-1	1.14613	1.07918	1.26	3	0.86	2.47	1.36232	1.24638	0.134279	0.0956494	0.188679	0.0943396	-0.724276	-1.02531	2.25486	1.24406	0.35312
3	MPS029	4	21	2.25	2.93	0.68	63.19	66.27	22.41	25.67	3.27	88.45	136.08	47.63	253.6	455.9	202.3	2.40415	2.65887	57	43	5010	6420	1411	4717	5436	4642	5697	1054	14	5	-8	1.14613	0.69897	1.72	3.5	1.36	3.17	2.02899	1.30435	0.307279	0.115393	0.0754717	0.132075	-1.12222	-0.879178	1.86609	1.14039	0.270933
3	MPS036	4	19	2.13	2.72	0.59	48.61	51.08	21.77	20.64	-1.13	61.24	90.72	29.48	293.7	394	100.3	2.4679	2.5955	46	54	3293	4569	1277	3139	3359	3081	3720	639	5	1	-3	0.69897	0	1.75	1.64	1.63	1.06	0.927536	1.18841	-0.0326691	0.0749648	0.0566038	0.132075	-1.24715	-0.879178
3	MPS052	7	25	2.59	3.38	0.79	50.12	52.93	10.43	11.02	0.59	79.38	106.59	27.22	294.4	339.8	45.5	2.46894	2.53122	55	45	5292.9	5651.2	358	3292.8	4117.7	4142	4651	509	17	22	6	1.23045	1.34242	3.22	3.21	2.54	2.39	1.30435	1.44928	0.115393	0.161151	2.5283	3.54717	0.402829	0.549882	0.647948	0.518359	-0.18846
3	MPS061	9	20	2.09	2.76	0.67	54.79	57.79	11.65	10	-1.65	70.31	106.59	36.29	281.1	377.5	96.4	2.44886	2.57692	80	20	5357	5849	492	3185.1	4083.27	4553	5115	563	8	18	10	0.90309	1.25527	3.96	4.98	2.65	4.33
3	MPS062	9	23	2.59	3.34	0.75	55.57	60.83	13.93	13.29	-0.64	56.7	106.59	49.9	386.3	347.1	-39.2	2.58692	2.54045	77	23	3802	4610	808	2843.6	3539.07	3335	4009	675	8	14	6	0.90309	1.14613	3.32	4.48	2.89	3.77	0.608696	0.753623	-0.2156	-0.122846	1.79245	2.4717	0.253448	0.392995	1.14039	0.414687	0.0570529
3	MPS063	5	19	1.98	2.61	0.63	49.21	50.78	15.97	18.42	2.45	61.24	77.11	15.88	393.1	471.7	78.6	2.5945	2.67367	67	33	4014	4720	706	2811.9	3968.35	3389	4198	809	7	17	10	0.845098	1.23045	2.68	4.46	2.52	4.65	1.01449	0.724638	0.00624895	-0.139879	2.18868	2	0.340182	0.30103	0.829374	0.518359	-0.0812498
3	MPS069	4	20	2.28	2.88	0.6	57.83	59.78	12.38	12.66	0.27	88.45	129.27	40.82	370.9	771.1	400.2	2.56926	2.88711	65	35	5318	6632	1314	4141.6	4688.91	4615	5636	1021	7	18	11	0.845098	1.25527	4.02	5.48	3	4.41	0.811594	0.550725	-0.0906611	-0.259065	1.73585	3.98113	0.239512	0.600007	0.933045	0.984881	-0.0300972
3	MPS077	4	20	2.53	3.18	0.65	55.88	58.15	16.6	16.42	-0.18	79.38	86.18	6.8	394.9	534.4	139.5	2.59649	2.72787	68	32	5383	6510	1127	3292.1	4583.09	4403	5364	961	10	10	0	1	1	2.41	4.83	2	3.84	0.753623	0.782609	-0.122846	-0.106455	1.09434	2	0.0391521	0.30103	0.233261	0.725702	-0.632157
3	MPS008	5	19	2.59	3.16	0.57	51.41	55.57	26.94	30.39	3.45	61.24	92.99	31.75	475.2	455	-20.2	2.67688	2.65801	75	25	3153	5056	1903	2676	2863	2834	4099	1264	7	4	-2	0.845098	0.60206	2.04	3.56	1.71	3
3	MPS013	9	21	2.67	3.39	0.72	61.51	64.46	23.31	25.4	2.09	52.16	97.52	45.36	456	366.7	-89.3	2.65896	2.56431	63	37	4958	6621	1663	2443	2911	3772	4171	399	2	6	4	0.30103	0.778151	2.21	2.89	1.29	1.43	0.550725	0.521739	-0.259065	-0.282547	0.358491	0.0566038	-0.445522	-1.24715	0.907127	0.725702	-0.0423317
3	MPS015	5	23	2.57	3.31	0.74	54.7	60.65	21.82	21.55	-0.27	102.06	151.95	49.9	342.7	386.4	43.7	2.53491	2.58704	59	41	5837	11118	5281	2992	3590	4385	7308	2923	10	15	4	1	1.17609	1.6	2.63	1.3	1.07	1.50725	0.521739	0.178184	-0.282547	0.0754717	0.0943396	-1.12222	-1.02531	0.958963	0.62203	-0.018198
3	MPS018	5	20	2.44	3.04	0.6	62.82	67.22	19.41	22.86	3.45	102.06	151.95	49.9	297.5	348.9	51.5	2.47349	2.5427	66	34	7091	10611	3520	4198	6712	5705	8025	2320	9	13	4	0.954243	1.11394	2.92	4.43	2	4.39	1.18841	0.695652	0.0749648	-0.157608	0.150943	0.132075	-0.821186	-0.879178	0.777538	0.699784	-0.109278
3	MPS025	7	20	2.33	2.91	0.58	54.52	56.25	11.66	12.16	0.5	83.91	106.59	22.68	315.9	449.6	133.6	2.49955	2.65283	74	26	6536	8316	1780	6008	7870	5989	7704	1715	17	11	-6	1.23045	1.04139	2.81	4.12	3.13	3.5	1.53623	0.463768	0.186457	-0.333699	0.113208	0.0566038	-0.946125	-1.24715	0.492441	0.311015	-0.307646
3	MPS027	7	21	1.89	2.46	0.57	53.21	56.38	20.09	24.99	4.9	70.31	111.13	40.82	345.1	417.5	72.4	2.53794	2.62066	61	39	3163.9	4854.3	1690	3219	5062	3022	4600	1578	15	13	-2	1.17609	1.11394	1.84	1.9	2.71	2.94	2.46377	0.724638	0.3916	-0.139879	0.132075	0.0566038	-0.879178	-1.24715	1.7365	0.75162	0.239675
3	MPS033	9	23	1.92	2.78	0.86	48.67	52.03	11.02	10.12	-0.91	74.84	120.2	45.36	332.6	478.7	146.1	2.52192	2.68006	73	27	4463	6333	1870	2534	3790	3663	5214	1550	8	0	-8	0.90309		2.4	3.02	1.68	1.56	1.68116	0.521739	0.225609	-0.282547	0.188679	0.0377358	-0.724276	-1.42325	1.24406	0.414687	0.0948415
3	MPS040	9	20	1.85	2.49	0.64	72.3	73.57	19.17	23.07	3.91	79.38	122.47	43.09	356.5	541.2	184.7	2.55206	2.73336	67	33	5942	7929	1987	4666	5914	5181	6885	1703	5	4	-1	0.69897	0.60206	2.34	3.27	1.72	3.5	2.17391	0.376812	0.337242	-0.423876	0.113208	0.0754717	-0.946125	-1.12222
3	MPS058	5	22	2.4	3.14	0.74	61.92	65.91	18.82	18.46	-0.36	79.38	131.54	52.16	392.5	524.9	132.4	2.59384	2.72008	77	23	3807	5638	1831	2323.5	2667	3222	4232	1010	2	13	11	0.30103	1.11394	2.86	4.3	2.11	3.71	0.608696	0.724638	-0.2156	-0.139879	2.41509	3	0.382934	0.477121	0.466523	0.311015	-0.331127
3	MPS078	5	22	2.83	3.42	0.59	58.92	60.83	15.69	15.92	0.23	52.16	83.91	31.75	274.2	432	157.8	2.43807	2.63548	66	34	7076.4	12494.7	5418	4015.7	4585.26	5634	9026	3392	2	13	11	0.30103	1.11394	4.88	6.23	3.6	3.32	1.13043	1.21739	0.0532455	0.0854302	6.37736	2.60377	0.804641	0.415603	0.829374	0.544276	-0.0812498
Mean		6.33333	20.8571	2.3119	3.00333	0.691429	56.74	60.0129	17.85	18.7286	0.879048	72.2519	111.129	38.8805	356.157	469.948	113.795	2.54296	2.65865	68.3333	31.6667	5022.69	6643.32	1620.67	3613.6	4450.12	4280.86	5421.67	1140.71	8.42857	11.2857	3.04762	0.839676	0.997326	2.70524	3.86238	2.17333	3.19905	1.3913	0.806763	0.0891349	-0.125616	1.27254	1.39308	-0.333019	-0.404127	0.989741	0.657667	-0.0682215
StdDev		1.98326	1.62129	0.287691	0.29897	0.141113	5.85305	5.90559	5.2696	6.04603	2.02994	15.3532	20.7116	13.2311	76.9556	133.796	146.627	0.0870089	0.105101	9.5149	9.5149	1207.78	2258.19	1561.65	966.622	1270.05	952.722	1499.42	954.719	4.75995	5.92573	6.46124	0.307186	0.317665	0.948028	1.15176	0.711536	1.16023	0.745049	0.327066	0.222485	0.171501	1.66749	1.621	0.687282	0.814247	0.550959	0.273124	0.250648
Count		21	21	21	21	21	21	21	21	21	21	21	21	21	21	21	21	21	21	21	21	21	21	21	21	21	21	21	21	21	21	21	21	20	21	21	21	21	18	18	18	18	18	18	18	18	16	16	16
within t-test					1.17277e-15			1.3245e-09		0.0610357			1.73072e-11			0.00197974			0.000361922				0.000120804			1.0525e-05		2.32901e-05			0.0635433			0.021214		3.50988e-07		0.000111161		0.00800056		0.00515948		0.669083		0.39327		0.00626709
t-test to mid			0.180596	0.0647036	0.0889956	3.04116e-13	0.804765	0.765299	0.495783	0.803707	0.0537955	0.134298	0.480812	0.416875	0.666971	0.208441	0.201616	0.81594	0.209477	0.119221	0.119221	0.439846	0.0746691	0.00167932	0.252884	0.101623	0.438127	0.0434072	0.000363988	0.118815	0.96107	0.313242	0.196558	0.810431	0.511742	0.28524	0.34799	0.582199	0.739743	0.516599	0.583347	0.638279	0.52019	0.537908	0.258179	0.108161	0.100181	0.100142	0.356042
t-test to low			0.851812	0.0137498	0.00622381	5.67676e-15	0.0942851	0.26273	0.623326	0.966594	0.123466	0.00201027	0.094474	0.13754	0.845377	0.0247943	0.0650423	0.857617	0.0131373	0.683844	0.683844	0.919284	0.308786	0.215342	0.31646	0.959246	0.818257	0.580765	0.365865	0.511492	0.684615	0.479134	0.912416	0.836009	0.696448	0.487465	0.960341	0.764636	0.123554	0.46243	0.0939401	0.486872	0.616582	0.658053	0.890088	0.421876	0.972496	0.138407	0.194881
Legend for missing data points and abbreviations
	PCr reaction did not amplifiy
	unstable housekeeping gene (HKG)
	limited resources to run analyses
	protein yield too low to run Western blot
	RNA capture yielded atypical values (too high or too low; +/- 3 SD from mean)
	could not post-squat due to lower back tenderness
	data log10 transformed and stats run on transformation
"T1"	PRE
"T39"	POST
[truncated: 58 more columns]
